# Supplementary material for: Development and validation of the renal dosing questionnaire (RDQ-13) for pharmacists
Source: PubMed Central journal article supplement — Medicine (Baltimore). 2024 Dec 20;103(51):e41004. doi: 10.1097/MD.0000000000041004 (PMC11666209; doi:10.1097/md.0000000000041004), 2024-12-20
Supplement: medi-103-e41004-s001.pdf [file medi-103-e41004-s001.pdf]

Appendix 1

**Pharmacist's attitude, self-reported knowledge and practice of dosage adjustment questionnaire (RDQ-13)**

**Demographics**

Gender

Female

Male

Age (years)

20–29

30–39

40–49

50–59

More than 60

Work experience (years)

<5

5-10 years

11-15 years

More than 16 years

Education qualifications

BSc Pharmacy/BPharm

PharmD

Higher studies

Other professional certificates/BCPS

Setting of working

Hospital Pharmacy

Clinical Pharmacy

Community Pharmacy

Retail Pharmacy

Designation of Pharmacist

Trainee Pharmacist

Resident Pharmacist

Staff Pharmacist

Assistant Manager Pharmacy

Manager/Senior Manager Pharmacy

Chief Pharmacist

Director Pharmacist

Drug references available

British National Formulary

Martindale

British Pharmacopeia/US Pharmacopeia

Lexicomp Drug Information Handbook

Micromedex

Other (Medscape, Renal Dosing Handbook, mobile applications, etc.)

**Knowledge:**

1. Related to renal dose adjustment?

a. Are you knowledgeable about renal dose adjustment?

Yes

No

b. Have you ever heard about the National Kidney Foundation KDOQI guidelines?

Yes

No

c. Are the medications excreted from the body through the kidneys?

Yes

No

d. Are you monitoring a patient's renal function during medication administration?

Yes

No

2. Factors to be considered when determining the appropriate dose for a patient with renal impairment

a. Age of the patient

Yes

No

b. Weight of the patient

Yes

No

c. The severity of the patient's renal impairment

Yes

No

d. The medication's pharmacokinetics and pharmacodynamics

Yes

No

3. Medications commonly require renal dose adjustment

a. Antibiotics

Yes

No

b. Antihypertensives

Yes

No

c. Analgesics

Yes

No

d. other medications

Yes

No

4. Calculating the appropriate dose for a patient with renal impairment

a. Use a formula based on the patient's creatinine clearance or estimated glomerular filtration rate (eGFR)

Yes

No

b. Follow dosing guidelines provided by the medication manufacturer

Yes

No

c. Consult with a specialist, such as a nephrologist

Yes

No

d. Consult with a specialist, such as a pharmacist

Yes

No

5. Consequences of not adjusting the dose of medications for patients with renal impairment

a. Increased risk of adverse drug reactions

Yes

No

b. Decreased medication efficacy

Yes

No

c. Reduced quality of life for the patient

Yes

No

d. Exaggerate symptoms of disease

Yes

No

6. Resources to determine the appropriate dose for a patient with renal impairment

a. Medication dosing guidelines

Yes

No

b. Clinical practice guidelines

Yes

No

c. Pharmacokinetic information

Yes

No

d. Pharmacodynamics information

Yes

No

**Attitude:**

7. How important is dose adjustment of medications for patients

a. Not important

b. Somewhat important

c. Moderately important

d. Very important

8. How confident are you in calculating the appropriate dose for a patient

a. Not at all confident

b. Somewhat confident

- c. Moderately confident
  - d. Very confident
9. Are you willing to consult the specialist regarding medication dose adjustment
- a. Not willing
  - b. Somewhat willing
  - c. Moderately willing
  - d. Very willing
10. How receptive are you to feedback regarding your prescribing practices for patients
- a. Not receptive at all
  - b. Somewhat receptive
  - c. Moderately receptive
  - d. Very receptive

**Perception:**

11. Encounter patients with renal impairment in your practice
- a. Rarely
  - b. Occasionally
  - c. Frequently
  - d. Very frequently
12. Frequently adjust medication doses for patients with renal impairment
- a. Rarely
  - b. Occasionally
  - c. Frequently
  - d. Very frequently
13. Believe that patients with renal impairment receive adequate medication management
- a. I'm not sure
  - b. Yes, medication management is adequate
  - c. Somewhat, but there is room for improvement
  - d. No, medication management could be improved

Most significant barriers to providing appropriate medication management for patients with renal impairment **(click whichever is appropriate, can select more than one option)**

1. Patient doesn't have time to discuss
2. Afraid of dealing with prescriber(s)
3. Insufficient time due to pressure from other work
4. Insufficient time due to high patient load
5. Lack of relevant drug information
6. Lack of knowledge and confidence
7. Insufficient patient medical history
8. Lack of information about patient's renal function

Would you like to attend courses/CME sessions on topics regarding renal dose adjustment?

- Yes
- No

If yes in which mode

- Online
- Face-to-face lecture
- Workshop
- Other if any

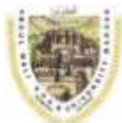

OFFICE OF THE DEAN  
FACULTY OF CHEMICAL AND LIFE SCIENCES  
ABDUL WALI KHAN UNIVERSITY, MARDAN-PAKISTAN  
[Sultanavaz@awkum.edu.pk](mailto:Sultanavaz@awkum.edu.pk) cell; 0937-843375

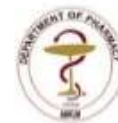

Ref. No/Dean/AWKUM/2021/

Date: 20/11/2021

**TO WHOM IT MAY CONCERN**

This is to certify that Ms. Roheena Zafar D/O Zafar Ali is PhD scholar of Pharmacy Department Abdul Wali Khan University, Mardan. She is conducting her research work on "Development and validation of the Renal Dosing Questionnaire (RDQ-13) Scale for Pharmacists" under the supervision of Dr. Inayat Ur Rehman and co-supervisor Dr. Yasir Shah. The ethical committee is pleased to grant ethical approval to Ms. Roheena Zafar to conduct her research work in any hospital care setting.

**Ethical Approval #: EC/AWKUM/2021/27**

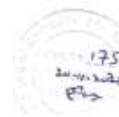

**Convener,  
University Ethical Committee &  
Dean, Faculty of Chemical and Life Sciences  
Abdul Wali Khan University, Mardan**
